# Supplementary material for: Enhanced visible-light-driven RhB removal with a Mo–Ni bimetallic sulfide/g-C3N4 nanosheet Schottky junction
Source: Royal Society of Chemistry journal article supplement (doi:10.1039/d2nj01100j), 2022-01-01
Supplement: d2nj01100j1.pdf [file d2nj01100j1.pdf]

## Electronic Supplementary Information

### Enhanced visible-light-driven RhB removal with Mo-Ni bimetallic sulfide/g-C<sub>3</sub>N<sub>4</sub> nanosheets Schottky junction

Yaying Li, Fen Xu\*, Lixian Sun\*, Xiaogang Xue, Yingjing Wang, Lumin Liao, Yanxun Guan, Bin Li, Kexiang Zhang, Yongjin Zou, Huanzhi Zhang

*Guangxi Key Laboratory of Information Materials & Guangxi Collaborative Innovation Center for Structure and Properties for New Energy and Materials; School of Material Science and Engineering, Guilin University of Electronic Technology, Guilin 541004, P. R. China*

\* Corresponding authors:

E-mail: xufen@guet.edu.cn (F. Xu), sunlx@guet.edu.cn (L. X. Sun)

### Contents

|                                                        |    |
|--------------------------------------------------------|----|
| <b>Fig. S1.</b> XPS spectra .....                      | S2 |
| <b>Fig. S2.</b> UV-vis absorption .....                | S2 |
| <b>Fig. S3.</b> UV-vis DRS and XPS valence .....       | S2 |
| <b>Fig. S4.</b> Photoelectrical measurement.....       | S3 |
| <b>Table S1.</b> XPS analysis of S 2p.....             | S4 |
| <b>Table S2.</b> BET .....                             | S4 |
| <b>Table S3.</b> Absorption edge and potentials.....   | S4 |
| <b>Table S4.</b> Fluorescence lifetime parameter ..... | S5 |

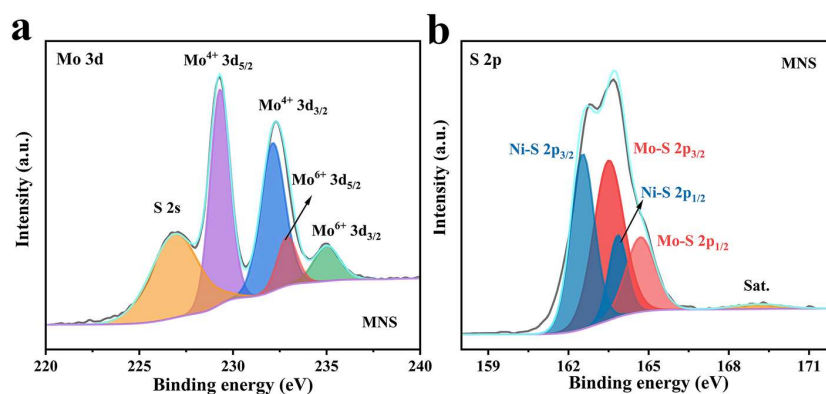

**Fig. S1.** XPS spectra of Mo 3d (a) and S 2p (b) of MNS.

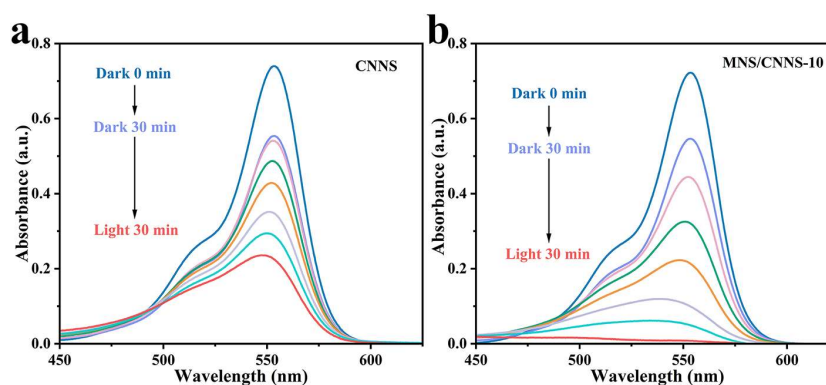

**Fig. S2.** The UV-vis absorption of CNNS (a) and MNS/CNNS-10 (b).

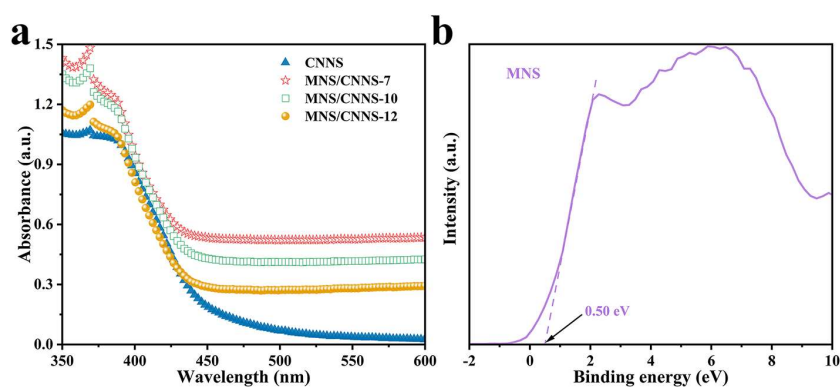

**Fig. S3.** (a) UV-vis DRS of samples; (b) XPS valence of MNS.

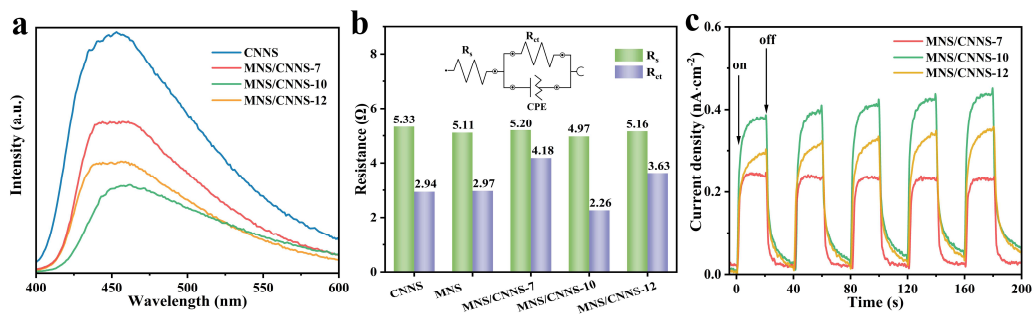

**Fig. S4.** PL (a),  $R_s$  and  $R_{ct}$  values (b) and the transient photocurrent responses (c) for as-prepared samples, inset shows the relative fitting circuit diagram.

**Table S1** XPS analysis of S 2p for MNS and MNS/CNNS-10.

| Samples     | Binding energy (eV) | Assignment             | Peak-area percentage (%) |
|-------------|---------------------|------------------------|--------------------------|
| MNS         | 162.5               | Ni-S 2p <sub>3/2</sub> | 39.0                     |
|             | 163.5               | Mo-S 2p <sub>3/2</sub> | 23.9                     |
|             | 163.8               | Ni-S 2p <sub>1/2</sub> | 14.2                     |
|             | 164.7               | Mo-S 2p <sub>1/2</sub> | 20.6                     |
|             | 169.1               | Sat.                   | 2.30                     |
| MNS/CNNS-10 | 162.1               | Ni-S 2p <sub>3/2</sub> | 40.1                     |
|             | 163.0               | Mo-S 2p <sub>3/2</sub> | 15.9                     |
|             | 163.5               | Ni-S 2p <sub>1/2</sub> | 20.3                     |
|             | 164.5               | Mo-S 2p <sub>1/2</sub> | 8.90                     |
|             | 168.8               | Sat.                   | 14.8                     |

**Table S2** BET surface area, average BJH pore size, and pore volume of CN, CNNS, MNS and MNS/CNNS-x.

| Sample      | Pore volume (cm <sup>3</sup> ·g <sup>-1</sup> ) | Pore diameter (nm) | BET surface area (m <sup>2</sup> ·g <sup>-1</sup> ) |
|-------------|-------------------------------------------------|--------------------|-----------------------------------------------------|
| CNNS        | 2.166                                           | 0.82               | 251.7                                               |
| MNS         | 0.177                                           | 0.822              | 32.8                                                |
| MNS/CNNS-7  | 0.303                                           | 0.822              | 38.1                                                |
| MNS/CNNS-10 | 0.573                                           | 3.415              | 76.1                                                |
| MNS/CNNS-12 | 0.120                                           | 3.425              | 83.6                                                |

**Table S3** Absorption edge and potentials of CNNS, MNS and MNS/CNNS-x.

| Sample      | Wavelength (nm) | VB (eV) | VB (V vs NHE) | Bandgap (eV) | CB (V vs NHE) |
|-------------|-----------------|---------|---------------|--------------|---------------|
| CNNS        | 454             | 1.25    | 1.31          | 2.61         | -1.30         |
| MNS         | 398             | 0.50    | 0.56          | 1.29         | -0.73         |
| MNS/CNNS-7  | 427             | 1.29    | 1.35          | 2.71         | -1.36         |
| MNS/CNNS-10 | 435             | 1.24    | 1.3           | 2.71         | -1.41         |
| MNS/CNNS-12 | 436             | 1.20    | 1.26          | 2.76         | -1.5          |

**Table S4** Fluorescence lifetime parameter of CNNS composites.

| Catalysts   | Lifetime (ns) |          | Pre-exponential factors B (%) |                | Average lifetime, $\tau$ (ns) |
|-------------|---------------|----------|-------------------------------|----------------|-------------------------------|
|             | $\tau_1$      | $\tau_2$ | B <sub>1</sub>                | B <sub>2</sub> |                               |
| CNNS        | 1.8994        | 11.5951  | 58.86                         | 41.14          | 5.89                          |
| MNS/CNNS-7  | 1.8705        | 12.0149  | 56.13                         | 43.87          | 6.32                          |
| MNS/CNNS-10 | 2.0811        | 14.6712  | 61.89                         | 38.11          | 6.88                          |
| MNS/CNNS-12 | 1.9861        | 11.7246  | 57.09                         | 42.91          | 6.16                          |
